# Supplementary material
Source: publisher site journal article supplement (https://www.kjim.org/upload/media/kjim-2020-701-suppl14.pdf)
Supplement: Supplementary file 1 [file kjim-2020-701-suppl14.pdf]

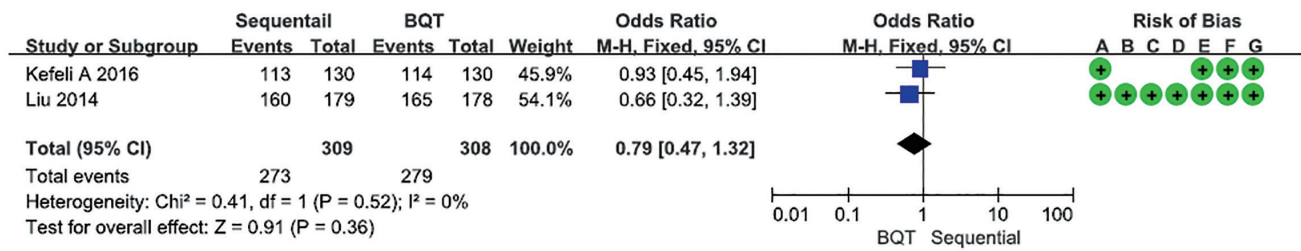

**Supplementary Figure 5.** Forest plot comparing the different therapies in terms of the eradication rates between sequential therapy and bismuth quadruple therapy (BQT) in intention-to-treat analysis. Risk of bias: A, random sequence generation (selection bias); B, allocation concealment (selection bias); C, blinding of participants and personnel (performance bias); D, blinding of outcome assessment (detection bias); E, incomplete outcome data (attrition bias); F, selective reporting (reporting bias); G, other bias. M-H, Mantel-Haenszel; CI, confidence interval.
